# Supplementary material
Source: Elsevier journal article supplement (https://www.sciencedirect.com/science/article/pii/S0210570521003137)
Supplement: mmc1 [file S0210570521003137:mmc1.doc]

**Full title:** Post-polypectomy colonoscopy surveillance: can we improve the diagnostic yield?

**Short title:** Post-polypectomy colonoscopy

**Authors:** Gemma Ibáñez-Sanz 1,2,3,4 PhD, Rebeca Sanz-Pamplona 1,3,4 PhD, Montse Garcia 4,5,6* PhD on behalf of the MSIC-SC research group^

**Affiliations:**

1Oncology Data Analytics Programme, Catalan Institute of Oncology, L’Hospitalet de Llobregat, Spain.

2Gastroenterology Department, Bellvitge University Hospital, L’Hospitalet de Llobregat, Spain.

3Colorectal Cancer Research Group, ONCOBELL Programme, Institut d'Investigació Biomèdica de Bellvitge (IDIBELL), L’Hospitalet de Llobregat, Spain.

4CIBER Epidemiology and Public Health (CIBERESP), Madrid, Spain.

5Cancer Screening Unit, Prevention and Control Programme, Catalan Institute of Oncology, L’Hospitalet de Llobregat, Spain.

6Early Detection of Cancer Research Group, EPIBELL Programme, Institut d'Investigació Biomèdica de Bellvitge (IDIBELL), L’Hospitalet de Llobregat, Spain.

^Membership of the MSIC-SC research group is provided in the Acknowledgments.

***Correspondence to:** Montse Garcia, PhD; Catalan Institute of Oncology. Av. Gran Via, 199-203, 08908, L’Hospitalet de Llobregat. Barcelona, Catalonia, Spain. [mgarcia@iconcologia.net](mailto:mgarcia@iconcologia.net)

**Supplementary Table 1** Quality assessment of the studies according to Ottawa Newcastle criteria

| **Author, Year** | **Selection** | **Comparability** | **Exposure** |
| --- | --- | --- | --- |
| Habermann et al., 2011[52] | *** | - | ** |
| Pereira et al., 2016[51] | **** | ** | *** |
| Macaron et al., 2016[50] | *** | ** | ** |
| Fiedler et al., 2019[47] | *** | * | ** |
| Fiedler et al., 2019[48] | *** | * | ** |
| Hua et al., 2020[49] | *** | ** | ** |
| Murcia et al., 2021[53] | **** | ** | *** |
| Carot et al., 2021[54] | **** | ** | *** |

A study can be awarded a maximum of one star for each numbered item within the Selection (n=4) and Outcome (n=2) categories. A maximum of two stars can be given for Comparability
